1 Short running title: City variation predicts the traits of birds

2 **Title: Socioeconomic variation across multiple cities predicts avian**  
3 **life-history strategies**

4 Kinnunen RP<sup>1</sup> \*, Fraser K<sup>1</sup>, Schmidt C<sup>1</sup>, Garroway CJ<sup>1</sup> \*

5 *Authors:* Riikka P Kinnunen (RPK), Kevin Fraser (KF), Chloé Schmidt (CS), Colin J Garroway  
6 (CJG)

7 *Affiliations:* kinnuner@myumanitoba.ca, Kevin.Fraser@umanitoba.ca,  
8 schmid46@myumanitoba.ca, Colin.Garroway@umanitoba.ca, Department of Biological  
9 Sciences, Biological Sciences Building, University of Manitoba, Winnipeg, MB, Canada R3T  
10 2N2

11 *Statement of authorship:* RPK, CS, and CJG conceived of the study. RPK and KF collected data  
12 and RPK built the dataset. RPK performed statistical analyses with input from CS and CJG. All  
13 authors contributed to data interpretation. RPK and CJG wrote the first draft of the manuscript,  
14 and all authors contributed to subsequent revisions.

15

16 *\*Correspondence:*

17 Riikka Kinnunen  
18 Biological Sciences Building, University of Manitoba  
19 50 Sifton Rd  
20 Winnipeg, MB, Canada R3T 2N2  
21 email: kinnuner@myumanitoba.ca

22

23 Colin Garroway  
24 Biological Sciences Building, University of Manitoba  
25 50 Sifton Rd  
26 Winnipeg, MB, Canada R3T 2N2  
27 phone: (204) 474-8267; email: colin.garroway@umanitoba.ca

28

## 29 **Abstract**

30 Cities are the planet's newest ecosystem and thus provide the opportunity to study community  
31 formation directly following major permanent environmental change. The human social and built  
32 components of environments can vary widely across different cities, yet it is largely unknown  
33 how these features of a city covary with the traits of colonizing species. We constructed a new  
34 dataset from open-source data with 44,670 observations of 160 Passerine species observed 1,908  
35 urban areas across the United States. We found that as a city's housing density and median  
36 income increased it tended to support more migratory species and species with smaller body  
37 sizes and shorter lifespans. This suggests that differential survival and reproduction at the  
38 species-level can quickly generate geographical patterns of species trait variation across urban  
39 environments similar to those found in natural settings without the need for evolutionary change.

40

## 41 **Introduction**

42 Spatial gradients of species life-history traits can occur if species with similar phenotypes tend to  
43 co-occur in similar environments (e.g., Vellend 2016; Pontarp et al. 2019). This is ecological  
44 selection (in the sense of Vellend 2016)—the phenotype-based differential survival and  
45 reproduction of members of different species due to environmental filtering (Kraft et al. 2015)  
46 and biotic interactions. Together with ecological drift, dispersal, and speciation, ecological  
47 selection contributes to the formation of spatial gradients in species richness, abundance, and  
48 composition (Vellend 2016). When environments change rapidly, ecological selection should be  
49 fast-acting with detectable effects in contemporary timeframes—species with sufficient access to  
50 a new environment either can or cannot persist in it. Ecological selection should be particularly

51 important for shaping communities immediately following disturbances and setting the stage for  
52 future evolutionary change in the new environment. Here we use the creation of cities as an  
53 instance of new habitat formation suited to exploring contemporary ecological selection.

54 Cities are the planet's newest ecosystems—ones where human social and built environments  
55 interact with natural physical and biological environments to shape ecosystem dynamics (Hobbs  
56 et al. 2006; Pickett et al. 2017). Cities cover ~3% of habitable land globally (Liu et al. 2014) with  
57 continued growth forecasted (Seto et al. 2011). Thus, city building has created a natural  
58 experiment with which we can explore how ecological selection shapes biodiversity following  
59 the rapid creation of a major new habitat type. While we know that cities are causing  
60 evolutionary change in urban species (e.g., Johnson & Munshi-South 2017; Schmidt et al. 2020),  
61 the ecological processes that shape initial biodiversity patterns—the starting material for  
62 subsequent evolutionary change—are less well known. To explore this, we analyzed how trait  
63 variation in native Passerines breeding in cities in the United States varies with socioeconomic  
64 features of different cities. We focused on socioeconomic heterogeneity because it reflects  
65 different aspects of resource availability and environmental disturbance levels, two factors  
66 known to correlate well with life-history trait variation. A city's socioeconomics directly reflects  
67 human activities—the defining feature of urban environments (Pickett et al. 2017). Despite this  
68 likely importance, the influence of socioeconomic heterogeneity on community formation is not  
69 well understood (Pickett et al. 2017).

70 Some species-level traits show clinal variation—thought to reflect adaptations to environmental  
71 variation (Lack 1947; James 1970; Evans et al. 2006; Olson et al. 2009). Resource availability  
72 and environmental stability in natural settings both tend to be negatively correlated with species  
73 body size and lifespan and positively related to reproductive output (Lack 1947, 1954; Martin

74 1987; Ricklefs 2000). This is thought to be because 1) large-bodied species are better able to  
75 withstand periods of low resource availability; 2) investment in fewer better-quality offspring in  
76 poor environments increases their likelihood of survival; 3) and being long-lived allows for  
77 multiple reproductive attempts given higher offspring mortality rates (Sol et al. 2012). Migration  
78 is another important life-history strategy associated with resource availability that allows species  
79 to cope with seasonality and periods of low productivity, particularly among birds, and migratory  
80 species generally select resource-rich stable habitats during the breeding season (Somveille et al.  
81 2015).

82 There is now considerable evidence from both birds and mammals suggesting that cities filter for  
83 subsets of local species that have traits suited to population persistence in urban environments  
84 (Chace & Walsh 2006; Kark et al. 2007; Croci et al. 2008; Leveau 2013; Meffert & Dziock  
85 2013; Meillère et al. 2015; Aronson et al. 2016; Silva et al. 2016; Jokimäki et al. 2016; Alberti et  
86 al. 2017; Leveau et al. 2017; Sepp et al. 2018; Santini et al. 2019; Hensley et al. 2019). Relative  
87 to non-urban species, successful urban colonizers tend to have larger body masses, bigger brains  
88 and be tolerant of a broad range of environments (Bonier et al. 2007; Croci et al. 2008;  
89 Maklakova et al. 2011; Lowry et al. 2013; Iglesias-Carrasco et al. 2019). The use of cities by  
90 migratory species is relatively unexplored, but there is some evidence that migratory birds may  
91 be underrepresented in urban ecosystems (Allen & O'Connor 2000; Kluza et al. 2000; Poague et  
92 al. 2000). Additionally, habitat suitability in cities represents a strong filter against tree and  
93 ground nesting birds compared to species that nest in artificial cavities, or on buildings (Lim &  
94 Sodhi 2004; Conole & Kirkpatrick 2011; Lizée et al. 2011; Jokimäki et al. 2016). Much of this  
95 previous work has focused on urban–rural species trait comparisons that treat different cities as  
96 homogeneous with respect to the features of species that can colonize them. However, it is

97 notable that in instances where species filtering has been explored across multiple cities different  
98 cities seem to filter for slightly different subsets of traits (Hensley et al. 2019). This finding  
99 suggests that different cities may be suited to different life-history strategies.

100 While cities are more similar to each other than they are to nearby rural lands, there is also clear  
101 variation across different cities in both their built and human social components. For example,  
102 plant diversity and vegetation cover—important predictors of urban biodiversity—are higher in  
103 wealthier areas (Talarchek 1990; Iverson & Cook 2000; Hope et al. 2003; Kinzig et al. 2005;  
104 Leong et al. 2018). At more local scales avian biodiversity is affected by features such as urban  
105 canopy cover, the composition of landscape plantings and the presence of lawns, the prevalence  
106 of bird feeders, and human food waste (Thompson et al. 2003; Lepczyk et al. 2004; Smith et al.  
107 2005, 2006; Tryjanowski et al. 2015). These features will be correlated with aspects of city-wide  
108 socioeconomic status and therefore biodiversity patterns across different urban areas. If  
109 ecological selection is important for community formation in urban environments we should  
110 expect that species best able to tolerate conditions in a particular city would share the phenotypic  
111 traits that enable persistence, just as we see trait variation converge across natural environments  
112 (Cleary et al. 2007; Jetz et al. 2008).

113 Here we ask whether socioeconomic heterogeneity across cities is predictive of the traits of  
114 Passerine species that colonize them. We used housing density, human population size, and  
115 median income as socioeconomic metrics likely to capture different axes of resource availability  
116 across cities. We hypothesized that wealthier cities would provide stable food and nesting  
117 resources similar to more natural and semi-natural resources in less disturbed contexts. We  
118 additionally hypothesized that cities with high housing densities and large human populations  
119 would provide more anthropogenic food resources due to supplemental feeding and food waste

120 and might provide more nesting opportunities for species that nest on built structures or artificial  
121 cavities. However, highly populated, densely housed cities will also be the most disturbed,  
122 polluted, and fragmented—all factors that could modify the relationship between traits and  
123 resources. We consequently predicted that cities with higher median incomes would impose  
124 ecological selection pressures similar to stable, resource-rich environments, favoring small,  
125 short-lived species with high reproductive outputs. In contrast cities with high housing densities  
126 and large human populations, which are more disturbed and stochastic environments, would  
127 select for larger, long-lived species that invest more in offspring quality over quantity.

128

## 129 **Methods**

### 130 *Data compilation*

131 We compiled a new dataset from open data sources (see SI Fig 1 for detailed data compilation  
132 process). First, we downloaded the eBird Basic Dataset for the United States from eBird.org  
133 (Sullivan et al. 2009). eBird is an online bird abundance and distribution checklist program  
134 jointly coordinated by the Cornell Laboratory of Ornithology and the National Audubon Society.  
135 The eBird project relies on citizen science volunteer observers who submit georeferenced  
136 observations of species to a centralized database. Regional reviewers identify outliers and verify  
137 each species observation based on sighting coordinates (Wood et al. 2011). The eBird Basic  
138 Dataset is a publicly available large core dataset with >100,000,000 observations worldwide  
139 (available from <https://ebird.org/>). We used eBird observations of Passerines from the United  
140 States so that we were working with related trophically similar species across cities with  
141 relatively comparable histories. We focused on Passerines because they are a broadly

142 comparable group with many species that have colonized cities. More precisely, we focused on  
143 native Passerines present and thought to be breeding in cities in the United States, and discarded  
144 observations of transient birds likely on route to their breeding grounds and observations of birds  
145 from outside of the breeding season. This ensured that our observations were focused on a period  
146 of high resource demand. We chose observations from May 27<sup>th</sup> to July 7<sup>th</sup> as our breeding  
147 season, following the practices of the North American Breeding Bird Survey (available from  
148 <https://www.pwrc.usgs.gov/bbs/index.cfm>). Our observations were filtered to include only those  
149 between 2010–2017 to match data availability for city variables which were last measured in  
150 2010 and to allow for the maximum accumulation of species detections in cities. The observation  
151 dates were filtered using the R package *auk* (version 0.3.3; Strimas-Mackey et al. 2018) in R  
152 version 3.5.0 (R Core Team 2018).

153 We extracted species-level data for body mass, clutch size, and longevity from the Amniote life-  
154 history database (Myhrvold et al. 2016). This is a systematically compiled database of  
155 life-history traits for birds, mammals, and reptiles built for comparative life-history analyses  
156 (Myhrvold et al. 2015). Bird species that are typically present in a single U.S. state year-round  
157 were classified as residents, and birds that do not have a year-round presence in a state (i.e.,  
158 migrate from elsewhere to breed) were classified as migrants. Next, we searched for data on  
159 nesting site preferences on the Cornell Lab of Ornithology Birds of North America online page  
160 (available from <https://birdsoftheworld.org/bow/home>) and filled in missing information with  
161 information from the Handbook of the Birds of the World (Del Hoyo et al. 2003-2011).

162 We assigned georeferenced eBird species records to urban areas using U.S. Census-defined  
163 urban area maps provided by the U.S. Census Bureau (U.S. Census Bureau 2010a). The urban  
164 area shapefiles define an urban area as a densely developed territory with at least 2500 people

165 (U.S. Census Bureau 2010a). We used the R packages *sp* (version 1.3-1; Bivand et al. 2013),  
166 *rgdal* (version 1.3-4; Bivand et al. 2018), and *maps* (version 3.3.0; Becker & Wilks 2018) for  
167 this merge. Next, we calculated socioeconomic features for these urban areas using census data  
168 from the U.S. Census Bureau (U.S. Census Bureau 2010b). Data were available for the year 2010  
169 and not the full span of our bird observation data. We thus assume that these data have remained  
170 comparable.

171 We were interested in species presence or absence in an urban area during a breeding season, not  
172 the number of observations of each species, and so our final data set was made up of presence  
173 data for each species observed in each city. We then excluded vagrants, introduced, and  
174 accidental observations of bird species from each state (see SI Tab. 1), as well as the brood  
175 parasites, Bronzed Cowbird (*Molothrus aeneus*) and Brown-headed Cowbird (*Molothrus ater*)  
176 from the family Icteridae, as brood parasites do not carry the fitness cost of reproduction in the  
177 same way that other species do.



178 *Data analyses*

179 Human population size, housing density (housing units per square mile), and median household  
180 income were not strongly correlated (SI Fig 3) and were treated as independent variables in a  
181 series of mixed models that used species traits as dependent variables. These species-level traits  
182 were clutch size, longevity (the lifespan of an individual in years), body mass (mass of an  
183 individual in grams), migratory status (migratory or resident), and nesting habitat (tree nesting,  
184 ground nesting or cavity nesting). Data were scaled to standardize the range of independent and  
185 dependent variables to make model effects comparable.

186 Clutch size, longevity, and body mass were treated as dependent variables in a series of linear  
187 mixed-effects models (LMMs). All urban variables were fit in each model. We also included  
188 taxonomic family and U.S. state as random effects allowing intercepts to vary. Random  
189 intercepts estimate between-group variation in means, as well as variation within groups in each  
190 of our dependent variables. Model residuals were plotted against the expected values and we saw  
191 no strong violations of the models' assumptions, except for body mass. We  $\log_{10}$ -transformed  
192 body mass to ensure the normality of residuals.

193 Migratory status and nesting preference were binary variables and so we fit these models using  
194 generalized linear mixed-effects models (GLMMs) with a binomial error structure and logit link  
195 function. The model structure was similar to that for LMMs with family and state treated as  
196 random effects and the city traits fit as independent variables. Migratory status was coded 1 for  
197 migratory species and 0 for residents. We used a similar series of models to explore nesting  
198 habits with tree nesters, ground nesters, and cavity nesters coded as 1 in three separate models  
199 and compared against all other nesting habits coded as 0.

200

## 201 **Results**

202 Our final dataset included 44,670 observations of 160 bird species from 26 families that had been  
203 observed at least once in 1,908 cities during at least one breeding season (Fig 1). Both housing  
204 density and median income were negatively related to species longevity and body mass. There  
205 were no detectable relationships between clutch size and any socioeconomic measure and no  
206 relationship between population size and any life-history trait (Fig 2; Tab. 1). Additionally, as  
207 housing density and median income increased, the likelihood of species being migratory  
208 increased (Fig 3; Tab. 2). There was a negative relationship between housing density and cavity  
209 nesters. There were no other detectable relationships identified in our models.

210

## 211 **Discussion**

212 The typical lifespans, body masses, and migratory status of species found across different cities  
213 varied with housing density and median income (Fig 4). This presumably reflects differences in  
214 the average fitness of a species given the local features of a particular city. This suggests that  
215 ecological selection—in this case associated with aspects of socioeconomics—plays an  
216 important role in determining biodiversity at the earliest stage of community formation following  
217 the emergence of new environments. Like environmental variation in natural habitats, cities vary  
218 in the details of their composition and different life-history strategies are better suited to different  
219 types of city.

220

221 It is generally expected that as the typical body size of a species increases, its reproductive  
222 output decreases, and lifespan increases (Bielby et al. 2007). This trait combination is thought to  
223 reflect trade-offs between current and future reproduction and survival given resource  
224 availability. We found that species body mass and lifespan varied together as expected if cities  
225 with high housing density and median income were relatively stable resource-rich environments  
226 (see description below). As the median income and housing density of a city increased the city  
227 tended to support smaller shorter-lived species. Contrary to our predictions, we found no  
228 evidence that clutch size covaried with either these life-history traits or the socioeconomic status  
229 of a city. Recent explorations of life-history trait variation have also found that mean number of  
230 offspring was not well correlated with other traits associated with the fast–slow continuum for  
231 birds and suggested that annual reproductive effort represents a second life-history strategy axis  
232 of variation (Healy et al. 2019). This could happen if trade-offs associated with reproduction do  
233 not always result in changes in annual reproductive output (Healy et al. 2019). More natural  
234 areas with plentiful and stable resources tend to support greater numbers of small-bodied species  
235 that prioritize reproduction at the expense of lifespan, due to high offspring survival rates.  
236 Stochastic or resource-poor environments tend to support larger, longer-lived species that  
237 prioritize adult survival over producing many offspring. This strategy is thought to buffer against  
238 the consequences of reproductive failures by spreading the risk of offspring mortalities across  
239 multiple breeding attempts during a longer lifetime. If this interpretation holds for different  
240 cities, it suggests that cities with high housing density and median income may be relatively  
241 stable, predictable habitats with readily available resources for urban birds. Our results further  
242 suggest that human population size is not a strong ecological filter for these traits.  
243

244 The results for migratory species support our resource and environmental variability-based  
245 interpretation of a city's housing density and median income. Urban areas with higher median  
246 income and greater housing densities tended to support relatively more migratory species,  
247 whereas again the human population size of a city was not important. Migratory species breed in  
248 cities less often than natural areas (Poague et al. 2000; Croci et al. 2008) and generally choose  
249 breeding sites with an excess of resources that are not completely exploited by resident birds  
250 (Dalby et al. 2014; Somveille et al. 2015). That more migratory species choose to breed in cities  
251 with high housing densities and higher median incomes suggests that they may be choosing these  
252 cities, at least in part, based on resource availability (Martin & Karr 1986; Faaborg et al. 2010;  
253 Jenkins et al. 2017).

254

255 Cities with more economic resources and higher housing densities might provide more stable,  
256 high-quality habitats for birds in many ways. There is a well-recognized positive correlation  
257 between urban plant diversity, vegetation cover, and wealth in cities (Iverson & Cook 2000;  
258 Hope et al. 2003; Kinzig et al. 2005; Leong et al. 2018). Higher housing density typically also  
259 means more backyards and gardens in people's yards in a city, and these diverse plant  
260 communities can provide important sources of food, cover, and nesting resources for birds  
261 (Thompson et al. 2003; Smith et al. 2005, 2006; Narango et al. 2018). In addition to vegetation,  
262 cities also provide stable year-round access to food sources via bird feeders and human food  
263 waste (Lepczyk et al. 2004; Tryjanowski et al. 2015) which influences urban bird community  
264 structure and breeding success (Robb et al. 2008; Galbraith et al. 2015). Wildlife feeding is a  
265 popular activity among people with recent estimates of ~ 59% of U.S. households providing food  
266 for mainly birds (U.S. Fish & Wildlife Service 2016). Bird feeders are also more concentrated in

267 densely populated areas of higher socioeconomic class (Fuller et al. 2008, 2013). Bird feeders  
268 can act as particularly important resources to Passerines, as many species are mainly granivores.  
269 Corvids, on the other hand, can as omnivores easily exploit human food waste. Our results also  
270 showed that as the housing density of a city increased, it tended to support fewer cavity nesting  
271 species. This suggests that fewer cavity-bearing trees and snags may be present in these cities,  
272 and that—for most species—artificial cavities and other human-associated structures cannot  
273 replace more natural nesting resources (Blewett & Marzluff 2005).

274  
275 Interestingly, housing density and human population size were only moderately correlated in our  
276 data, yielding more nuanced insights into the effects of human activity versus city structure.  
277 Traits fell along our housing density axis similarly to median income, indicating that housing  
278 density, like wealth, creates stability in resources and habitat. We speculate that highly populated  
279 cities are the most disturbed in terms of traffic levels, noise, artificial light, and pollution  
280 (McKinney 2001, 2002; Luck 2007; Isaksson 2018; Strohbach et al. 2019). Each of these factors  
281 could make highly populated areas generally poor habitat for birds.

282  
283 Explaining the general geographical patterns of species trait variation (e.g., body size variation)  
284 has been difficult, and the topic remains controversial (Blackburn et al. 1999; Meiri & Dayan  
285 2003; Meiri & Thomas 2007; Olson et al. 2009). For example, body size in birds has been linked  
286 to temperature, resource availability, seasonality, and environmental stability (James 1970;  
287 Murphy 1985; Olson et al. 2009; Sun et al. 2017). Our results demonstrate that ecological  
288 selection can quickly generate patterns of species trait variation across cities similar to those

289 found in natural settings. In this case, we did not find gradual spatial clines, but rather  
290 heterogeneous patches across which life-history traits vary similarly to those seen across natural  
291 environments. Although cities are generally more similar to each other than to their natural  
292 surroundings, our results suggest that from a bird's eye view, they are heterogeneous habitats  
293 supporting different life-history strategies that in part depend on socioeconomic factors and the  
294 built environment. When using cities as replicates in studies of urban wildlife (Szulkin  
295 et al. 2020) the assumption that different cities are directly comparable should be made with  
296 care. As the world's most rapidly growing ecosystem, understanding what kinds of species  
297 initially colonize cities provides important information about how the distribution of biodiversity  
298 will change following rapid, human-caused environmental shifts in an era of global change. It is  
299 also important for us to understand how cities support nature because it is now within cities that  
300 most people interact with and benefit from local biodiversity (e.g., through recreational activities  
301 and ecosystem services; Bolund and Hunhammar 1999). Finally, although cities tend to support  
302 fewer species than nearby natural areas (Chace & Walsh 2006), on average urban biodiversity is  
303 primarily comprised of native species (Aronson et al. 2014). These findings in addition to our  
304 results suggest that cities could play a more important role in conservation and management than  
305 they currently do.

306

307

## 308 **Acknowledgments**

309 We particularly want to thank Alyssa Garrard for collecting data on Passerine nesting site  
310 preferences as well as the other members of the Population Ecology & Evolutionary Genetics

311 Group for their helpful comments on manuscript drafts. We also want to acknowledge the work  
312 done by the eBird citizen-science observers. This study was supported by a discovery grant of  
313 the Natural Sciences and Engineering Research Council of Canada (NSERC) to CJG. RPK and  
314 CS were additionally supported by the University of Manitoba Graduate Fellowships and a  
315 University of Manitoba Graduate Enhancement of Tri-council funding grant to CJG.

## 316 **References**

- 317 Alberti, M., Marzluff, J. & Hunt, V.M. (2017). Urban driven phenotypic changes: empirical  
318 observations and theoretical implications for eco-evolutionary feedback. *Philos. Trans. R.*  
319 *Soc. B Biol. Sci.*, 372, 20160029.
- 320 Allen, A.P. & O'Connor, R.J. (2000). Hierarchical correlates of bird assemblage structure on  
321 northeastern U.S.A. lakes. *Environ. Monit. Assess.*, 62, 15–37.
- 322 Aronson, M.F.J., Nilon, C.H., Lepczyk, C.A., Parker, T.S., Warren, P.S., Cilliers, S.S. et al.  
323 (2016). Hierarchical filters determine community assembly of urban species pools. *Ecology*,  
324 97, 2952–2963.
- 325 Aronson, M.F.J., La Sorte, F.A., Nilon, C.H., Katti, M., Goddard, M.A., Lepczyk, C.A. et al.  
326 (2014). A global analysis of the impacts of urbanization on bird and plant diversity reveals  
327 key anthropogenic drivers. *Proc. R. Soc. B Biol. Sci.*, 281, 20133330–20133330.
- 328 Becker, R. & Wilks, A. (2018). Original S code. R version by Ray Brownrigg. Enhancements by  
329 Thomas P Minka and Alex Deckmyn. maps: Draw Geographical Maps.
- 330 Bielby, J., Mace, G.M., Bininda-Emonds, O.R.P., Cardillo, M., Gittleman, J.L., Jones, K.E. et al.  
331 (2007). The fast-slow continuum in mammalian life history: An empirical reevaluation. *Am.*  
332 *Nat.*, 169, 748–757.
- 333 Birds of North America Online. (2019). Cornell Lab of Ornithology, Ithaca, NY, USA. Available  
334 from <https://birdsoftheworld.org/bow/home>.
- 335 Bivand, R., Keitt, T.H., Rowlingson, B. & Pebesma, E. (2018). rgdal: Bindings for the  
336 Geospatial Data Abstraction.
- 337 Bivand, R.S., Pebesma, E., Gómez-Rubio, V., Bivand, R.S., Pebesma, E. & Gómez-Rubio, V.  
338 (2013). Hello world: Introducing spatial data. In: *Appl. Spat. Data Anal. with R*. Springer  
339 New York, pp. 1–16.
- 340 Blackburn, T.M., Gaston, K.J. & Loder, N. (1999). Geographic gradients in body size: A  
341 clarification of Bergmann's rule. *Divers. Distrib.*, 5, 165–174.
- 342 Blewett, C.M. & Marzluff, J.M. (2005). Effects of urban sprawl on snags and the abundance and  
343 productivity of cavity-nesting birds. *Condor*, 107, 678–693.
- 344 Bolund, P. & Hunhammar, S. (1999). Ecosystem services in urban areas. *Ecol. Econ.*, 29, 293–  
345 301.
- 346 Bonier, F., Martin, P.R. & Wingfield, J.C. (2007). Urban birds have broader environmental  
347 tolerance. *Biol. Lett.*, 3, 670–673.
- 348 Chace, J.F. & Walsh, J.J. (2006). Urban effects on native avifauna: a review. *Landsc. Urban*  
349 *Plan.*, 74, 46–69.
- 350 Cleary, D.F.R., Boyle, T.J.B., Setyawati, T., Anggraeni, C.D., Van Loon, E.E. & Menken, S.B.J.  
351 (2007). Bird species and traits associated with logged and unlogged forest in Borneo. *Ecol.*  
352 *Appl.*, 17, 1184–1197.



- 353 Conole, L.E. & Kirkpatrick, J.B. (2011). Functional and spatial differentiation of urban bird  
354 assemblages at the landscape scale. *Landscape Urban Plan.*, 100, 11–23.
- 355 Croci, S., Butet, A. & Clergeau, P. (2008). Does urbanization filter birds on the basis of their  
356 biological traits? *Condor*, 110, 223–240.
- 357 Dalby, L., McGill, B.J., Fox, A.D. & Svenning, J.C. (2014). Seasonality drives global-scale  
358 diversity patterns in waterfowl (Anseriformes) via temporal niche exploitation. *Glob. Ecol.  
359 Biogeogr.*, 23, 550–562.
- 360 eBird. (2017). eBird: An online database of bird distribution and abundance [web application].  
361 eBird, Cornell Lab of Ornithology, Ithaca, New York. Available from <http://www.ebird.org>.
- 362 Evans, K.L., James, N.A. & Gaston, K.J. (2006). Abundance, species richness and energy  
363 availability in the North American avifauna. *Glob. Ecol. Biogeogr.*, 15, 372–385.
- 364 Faaborg, J., Holmes, R.T., Anders, A.D., Bildstein, K.L., Dugger, K.M., Gauthreaux, S.A. et al.  
365 (2010). Recent advances in understanding migration systems of New World land birds.  
366 *Ecol. Monogr.*, 80, 3–48.
- 367 Fuller, R.A., Irvine, K.N., Davies, Z.G., Armsworth, P.R. & Gaston, K.J. (2013). Interactions  
368 between people and birds in urban landscapes. In: *Urban Bird Ecol. Conserv.* University of  
369 California Press, pp. 249–266.
- 370 Fuller, R.A., Warren, P.H., Armsworth, P.R., Barbosa, O. & Gaston, K.J. (2008). Garden bird  
371 feeding predicts the structure of urban avian assemblages. *Divers. Distrib.*, 14, 131–137.
- 372 Galbraith, J.A., Beggs, J.R., Jones, D.N. & Stanley, M.C. (2015). Supplementary feeding  
373 restructures urban bird communities. *Proc. Natl. Acad. Sci. U. S. A.*, 112, E2648–E2657.
- 374 Healy, K., Ezard, T.H.G., Jones, O.R., Salguero-Gómez, R. & Buckley, Y.M. (2019). Animal  
375 life history is shaped by the pace of life and the distribution of age-specific mortality and  
376 reproduction. *Nat. Ecol. Evol.*, 3, 1217–1224.
- 377 Hensley, C.B., Trisos, C.H., Warren, P.S., MacFarland, J., Blumenshine, S., Reece, J. et al.  
378 (2019). Effects of urbanization on native bird species in three southwestern US cities. *Front.  
379 Ecol. Evol.*, 7, 71.
- 380 Hobbs, R.J., Arico, S., Aronson, J., Baron, J.S., Bridgewater, P., Cramer, V.A. et al. (2006).  
381 Novel ecosystems: Theoretical and management aspects of the new ecological world order.  
382 *Glob. Ecol. Biogeogr.*, 15, 1–7.
- 383 Hope, D., Gries, C., Zhu, W., Fagan, W.F., Redman, C.L., Grimm, N.B. et al. (2003).  
384 Socioeconomics drive urban plant diversity. *Proc. Natl. Acad. Sci. U. S. A.*, 100, 8788–  
385 8792.
- 386 Del Hoyo, J., Elliott, A. & Christie, D.A. (2003-2011). *Handbook of the birds of the world (Vols.  
387 8 – 16)*. Barcelona: Lynx editions.
- 388 Iglesias-Carrasco, M., Duchêne, D.A., Head, M.L., Møller, A.P. & Cain, K. (2019). Sex in the  
389 city: Sexual selection and urban colonization in passerines. *Biol. Lett.*, 15.
- 390 Isaksson, C. (2018). Impact of urbanization on birds. In: *Bird Species How They Arise, Modify*

- 391 *Vanish*. pp. 235–257. Springer, Cham.
- 392 Iverson, L. & Cook, E. (2000). Urban forest cover of the Chicago region and its relation to  
393 household density and income. *Urban Ecosyst.*, 4, 105–124.
- 394 James, F.C. (1970). Geographic Size Variation in Birds and Its Relationship to Climate. *Ecology*,  
395 51, 365–390.
- 396 Jenkins, J.M.A., Thompson, F.R. & Faaborg, J. (2017). Species-specific variation in nesting and  
397 postfledging resource selection for two forest breeding migrant songbirds. *PLoS One*, 12.
- 398 Jetz, W., Sekercioglu, C.H., Böhning-Gaese, K., Burgess, N. & Powell, G. (2008). The  
399 Worldwide Variation in Avian Clutch Size across Species and Space. *PLoS Biol.*, 6, e303.
- 400 Johnson, M.T.J. & Munshi-South, J. (2017). Evolution of life in urban environments. *Science*  
401 (80- ).
- 402 Jokimäki, J., Suhonen, J., Jokimäki-Kaisanlahti, M.L. & Carbó-Ramírez, P. (2016). Effects of  
403 urbanization on breeding birds in European towns: Impacts of species traits. *Urban*  
404 *Ecosyst.*, 19, 1565–1577.
- 405 Kark, S., Iwaniuk, A., Schalimtzek, A. & Banker, E. (2007). Living in the city: Can anyone  
406 become an “urban exploiter”? *J. Biogeogr.*, 34, 638–651.
- 407 Kinzig, A.P., Warren, P., Martin, C., Hope, D. & Katti, M. (2005). The effects of human  
408 socioeconomic status and cultural characteristics on urban patterns of biodiversity. *Ecol.*  
409 *Soc.*, 10.
- 410 Kluza, D.A., Griffin, C.R. & Degraaf, R.M. (2000). Housing developments in rural New  
411 England: effects on forest birds. *Anim. Conserv.*, 3, 15–26.
- 412 Kraft, N.J.B., Adler, P.B., Godoy, O., James, E.C., Fuller, S. & Levine, J.M. (2015). Community  
413 assembly, coexistence and the environmental filtering metaphor. *Funct. Ecol.*, 29, 592–599.
- 414 Lack, D. (1947). The significance of clutch size. *Ibis (Lond. 1859)*, 89, 302–352.
- 415 Lack, D. (1954). *The natural regulation of animal numbers. Nat. Regul. Anim. Numbers*. Oxford:  
416 Clarendon Press. London: Geoffrey Cumberlege, Oxford University Press, Amen House,  
417 Warwick Square, E.C. 4.
- 418 Leong, M., Dunn, R.R. & Trautwein, M.D. (2018). Biodiversity and socioeconomics in the city:  
419 a review of the luxury effect. *Biol. Lett.*
- 420 Lepczyk, C.A., Mertig, A.G. & Liu, J. (2004). Assessing landowner activities related to birds  
421 across rural-to-urban landscapes. *Environ. Manage.*, 33, 110–125.
- 422 Leveau, L.M. (2013). Bird traits in urban–rural gradients: how many functional groups are there?  
423 *J. Ornithol.*, 154, 655–662.
- 424 Leveau, L.M., Leveau, C.M., Villegas, M., Cursach, J.A. & Suazo, C.G. (2017). Bird  
425 communities along urbanization gradients: A comparative analysis among three neotropical  
426 cities. *Ornitol. Neotrop.*, 28, 77–87.
- 427 Lim, H.C. & Sodhi, N.S. (2004). Responses of avian guilds to urbanisation in a tropical city.

- 428 *Landsc. Urban Plan.*, 66, 199–215.
- 429 Liu, Z., He, C., Zhou, Y. & Wu, J. (2014). How much of the world's land has been urbanized,  
430 really? A hierarchical framework for avoiding confusion. *Landsc. Ecol.*, 29, 763–771.
- 431 Lizée, M.H., Mauffrey, J.F., Tatoni, T. & Deschamps-Cottin, M. (2011). Monitoring urban  
432 environments on the basis of biological traits. *Ecol. Indic.*, 11, 353–361.
- 433 Lowry, H., Lill, A. & Wong, B.B.M. (2013). Behavioural responses of wildlife to urban  
434 environments. *Biol. Rev.*, 88, 537–549.
- 435 Luck, G.W. (2007). A review of the relationships between human population density and  
436 biodiversity. *Biol. Rev.*, 82, 607–645.
- 437 Maklakova, A.A., Immler, S., Gonzalez-Voyer, A., Rönn, J. & Kolm, N. (2011). Brains and the  
438 city: Big-brained passerine birds succeed in urban environments. *Biol. Lett.*, 7, 730–732.
- 439 Martin, T.E. (1987). Food as a limit on breeding birds: a life-history perspective. *Annu. Rev.*  
440 *Ecol. Syst.*, 18, 453–487.
- 441 Martin, T.E. & Karr, J.R. (1986). Patch utilization by migrating birds: resource oriented? *Ornis*  
442 *Scand.*, 17, 165–174.
- 443 McKinney, M.L. (2001). Role of human population size in raising bird and mammal threat  
444 among nations. *Anim. Conserv.*, 4, 45–57.
- 445 McKinney, M.L. (2002). Urbanization, biodiversity, and conservation. *Bioscience*, 52, 883–890.
- 446 Meffert, P.J. & Dzioc, F. (2013). The influence of urbanisation on diversity and trait  
447 composition of birds. *Landsc. Ecol.*, 28, 943–957.
- 448 Meillère, A., Brischoux, F., Parenteau, C. & Angelier, F. (2015). Influence of urbanization on  
449 body size, condition, and physiology in an urban exploiter: A multi-component approach.  
450 *PLoS One*, 10.
- 451 Meiri, S. & Dayan, T. (2003). On the validity of Bergmann's rule. *J. Biogeogr.*, 30, 331–351.
- 452 Meiri, S. & Thomas, G.H. (2007). The geography of body size - Challenges of the interspecific  
453 approach. *Glob. Ecol. Biogeogr.*, 16, 689–693.
- 454 Murphy, E.C. (1985). Bergmann's Rule, Seasonality, and Geographic Variation in Body Size of  
455 House Sparrows. *Evolution (N. Y.)*, 39, 1327.
- 456 Myhrvold, N.P., Baldrige, E., Chan, B., Sivam, D., Freeman, D. L. & Ernest, S.K.M. (2016).  
457 An amniote life-history database to perform comparative analyses with birds, mammals,  
458 and reptiles. Available from <http://esapubs.org/archive/ecol/E096/269/>.
- 459 Myhrvold, N.P., Baldrige, E., Chan, B., Sivam, D., Freeman, D.L. & Ernest, S.K.M. (2015). An  
460 amniote life-history database to perform comparative analyses with birds, mammals, and  
461 reptiles. *Ecology*, 96, 3109–000.
- 462 Narango, D.L., Tallamy, D.W. & Marra, P.P. (2018). Nonnative plants reduce population growth  
463 of an insectivorous bird. *Proc. Natl. Acad. Sci. U. S. A.*, 115, 11549–11554.

- 464 North American Breeding Bird Survey. (2018). USGS Patuxent Wildlife Research Center.  
465 Laurel, MD, USA. Available from <https://www.pwrc.usgs.gov/bbs/index.cfm>.
- 466 Olson, V.A., Davies, R.G., Orme, C.D.L., Thomas, G.H., Meiri, S., Blackburn, T.M. et al.  
467 (2009). Global biogeography and ecology of body size in birds. *Ecol. Lett.*, 12, 249–259.
- 468 Pickett, S.T.A., Cadenasso, M.L., Rosi-Marshall, E.J., Belt, K.T., Groffman, P.M., Grove, J.M.  
469 et al. (2017). Dynamic heterogeneity: a framework to promote ecological integration and  
470 hypothesis generation in urban systems. *Urban Ecosyst.*, 20.
- 471 Poague, K.L., Johnson, R.J. & Young, L.J. (2000). Bird Use of Rural and Urban Converted  
472 Railroad Rights-of-Way in Southeast Nebraska. *Wildl. Soc. Bull.*, 28, 852–864.
- 473 Pontarp, M., Bunnefeld, L., Cabral, J.S., Etienne, R.S., Fritz, S.A., Gillespie, R. et al. (2019).  
474 The Latitudinal diversity gradient: Novel understanding through mechanistic eco-  
475 evolutionary models. *Trends Ecol. Evol.*, 34, 211–223.
- 476 R Core Team. (2018). R: A language and environment for statistical computing. R Foundation for  
477 Statistical Computing, Vienna, Austria.
- 478 Ricklefs, R.E. (2000). Density dependence, evolutionary optimization, and the diversification of  
479 avian life histories. *Condor*, 102, 9–22.
- 480 Robb, G.N., McDonald, R.A., Chamberlain, D.E., Reynolds, S.J., Harrison, T.J.E. & Bearhop, S.  
481 (2008). Winter feeding of birds increases productivity in the subsequent breeding season.  
482 *Biol. Lett.*, 4, 220–223.
- 483 Santini, L., González-Suárez, M., Russo, D., Gonzalez-Voyer, A., von Hardenberg, A. &  
484 Ancillotto, L. (2019). One strategy does not fit all: determinants of urban adaptation in  
485 mammals. *Ecol. Lett.*
- 486 Schmidt, C., Domaratzki, M., Kinnunen, R.P., Bowman, J. & Garroway, C.J. (2020). Continent-  
487 wide effects of urbanization on bird and mammal genetic diversity. *Proc. R. Soc. B Biol.*  
488 *Sci.*, 287, 20192497.
- 489 Sepp, T., McGraw, K.J., Kaasik, A. & Giraudeau, M. (2018). A review of urban impacts on  
490 avian life-history evolution: Does city living lead to slower pace of life? *Glob. Chang. Biol.*,  
491 24, 1452–1469.
- 492 Seto, K.C., Fragkias, M., Güneralp, B. & Reilly, M.K. (2011). A meta-analysis of global urban  
493 land expansion. *PLoS One*, 6.
- 494 Silva, C.P., Sepúlveda, R.D. & Barbosa, O. (2016). Nonrandom filtering effect on birds: Species  
495 and guilds response to urbanization. *Ecol. Evol.*, 6.
- 496 Smith, R.M., Gaston, K.J., Warren, P.H. & Thompson, K. (2005). Urban domestic gardens (V):  
497 Relationships between landcover composition, housing and landscape. *Landsc. Ecol.*, 20,  
498 235–253.
- 499 Smith, R.M., Thompson, K., Hodgson, J.G., Warren, P.H. & Gaston, K.J. (2006). Urban  
500 domestic gardens (IX): Composition and richness of the vascular plant flora, and  
501 implications for native biodiversity. *Biol. Conserv.*, 129, 312–322.

- 502 Sol, D., Maspons, J., Vall-llosera, M., Bartomeus, I., García-Peña, G.E., Piñol, J. et al. (2012).  
503 Unraveling the life history of successful invaders. *Science* (80-. ), 337, 580–583.
- 504 Somveille, M., Rodrigues, A.S.L. & Manica, A. (2015). Why do birds migrate? A  
505 macroecological perspective. *Glob. Ecol. Biogeogr.*, 24, 664–674.
- 506 Strimas-Mackey, M., Miller, E., Hochachka, W. (2018). *auk: eBird Data Extraction and*  
507 *Processing with AWK. R package version 0.3.3.*
- 508 Strohbach, M.W., Döring, A.O., Möck, M., Sedrez, M., Mumm, O., Schneider, A.K. et al.  
509 (2019). The “hidden urbanization”: Trends of impervious surface in low-density housing  
510 developments and resulting impacts on the water balance. *Front. Environ. Sci.*, 7, 29.
- 511 Szulkin M., Garroway C.J., Corsini M., Kotarba A.Z., Dominoni D (2020) How to quantify  
512 urbanisation when testing for urban evolution? In: Urban Evolutionary Biology. Edited by  
513 Marta Szulkin, Jason Munshi-South and Anne Charmantier: Oxford University Press. Pgs  
514 13-35
- 515 Sullivan, B.L., Wood, C.L., Iliff, M.J., Bonney, R.E., Fink, D. & Kelling, S. (2009). eBird: A  
516 citizen-based bird observation network in the biological sciences. *Biol. Conserv.*, 142,  
517 2282–2292.
- 518 Sun, Y., Li, M., Song, G., Lei, F., Li, D. & Wu, Y. (2017). The role of climate factors in  
519 geographic variation in body mass and wing length in a passerine bird. *Avian Res.*, 8, 1.
- 520 Talarchek, G.M. (1990). The urban forest of New Orleans: An exploratory analysis of  
521 relationships. *Urban Geogr.*, 11, 65–86.
- 522 Thompson, K., Austin, K.C., Smith, R.M., Warren, P.H., Angold, P.G. & Gaston, K.J. (2003).  
523 Urban domestic gardens (I): Putting small-scale plant diversity in context. *J. Veg. Sci.*, 14,  
524 71–78.
- 525 Tryjanowski, P., Skórka, P., Sparks, T.H., Biaduń, W., Brauze, T., Hetmański, T. et al. (2015).  
526 Urban and rural habitats differ in number and type of bird feeders and in bird species  
527 consuming supplementary food. *Environ. Sci. Pollut. Res.*, 22, 15097–15103.
- 528 U.S. Census Bureau. (2010a). TIGER/Line Shapefiles: Urban Areas. Available from  
529 <https://www.census.gov/geo/maps-data/data/tiger-line.html>.
- 530 U.S. Census Bureau. (2010b). 2010 Census. Available from  
531 <https://factfinder.census.gov/faces/tableservices/jsf/pages/productview.xhtml?src=bkmk>.
- 532 U.S. Fish & Wildlife Service. (2016). *National Survey of Fishing, Hunting, & Wildlife-*  
533 *Associated Recreation (FHWAR)*. Arlington, VA.
- 534 Vellend, M. (2016). *The theory of ecological communities*. Princeton University Press, Princeton  
535 and Oxford.
- 536 Wood, C., Sullivan, B., Iliff, M., Fink, D. & Kelling, S. (2011). eBird: Engaging birders in  
537 science and conservation. *PLoS Biol.*, 9.
- 538



## Tables and Figures

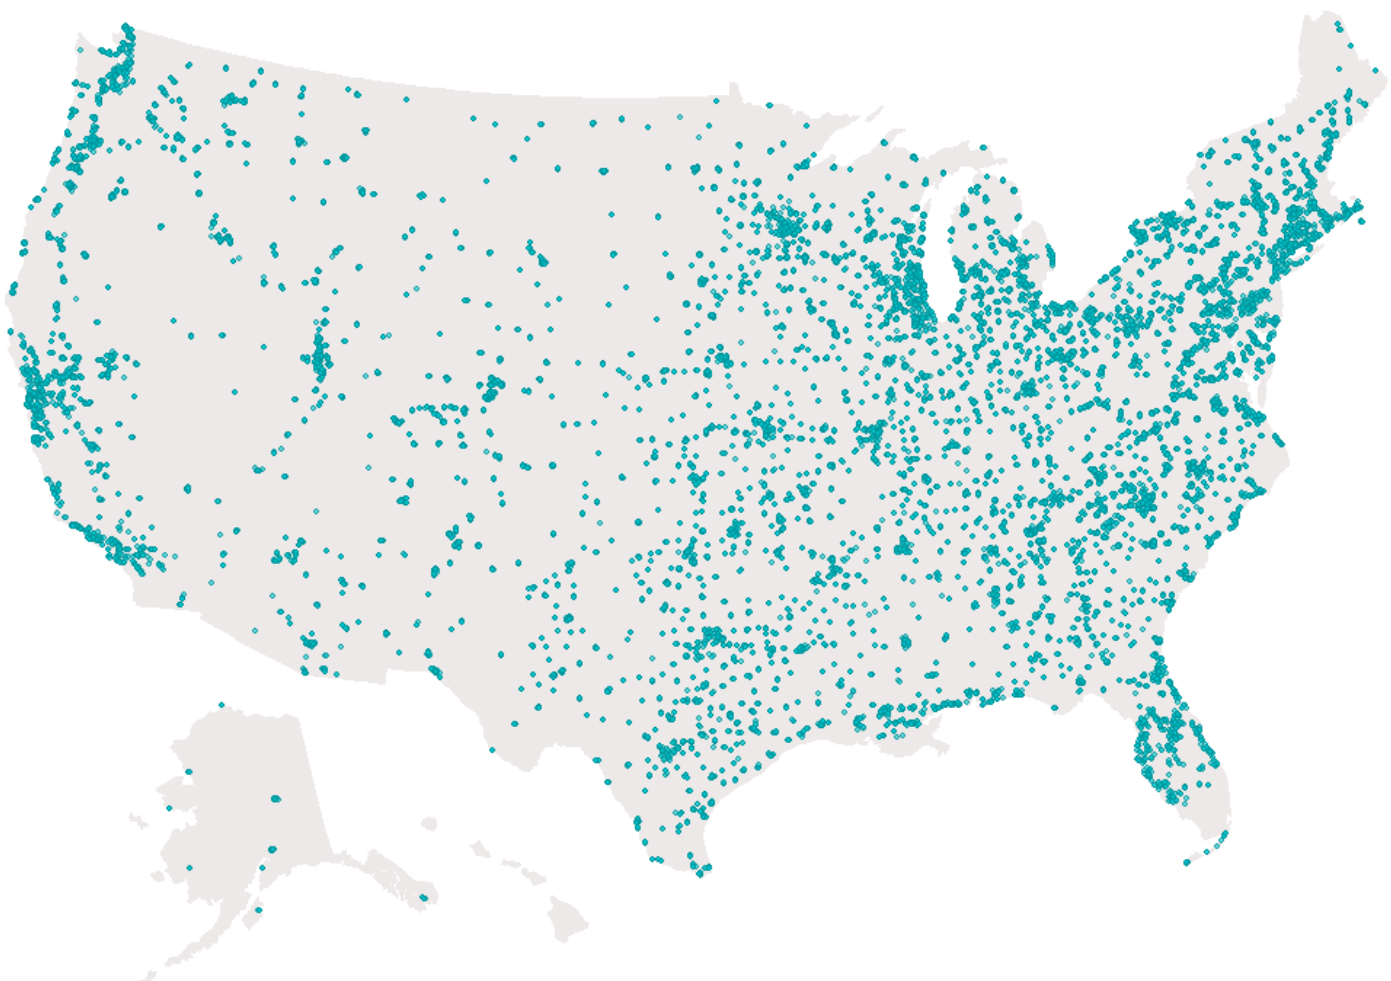

**Figure 1**

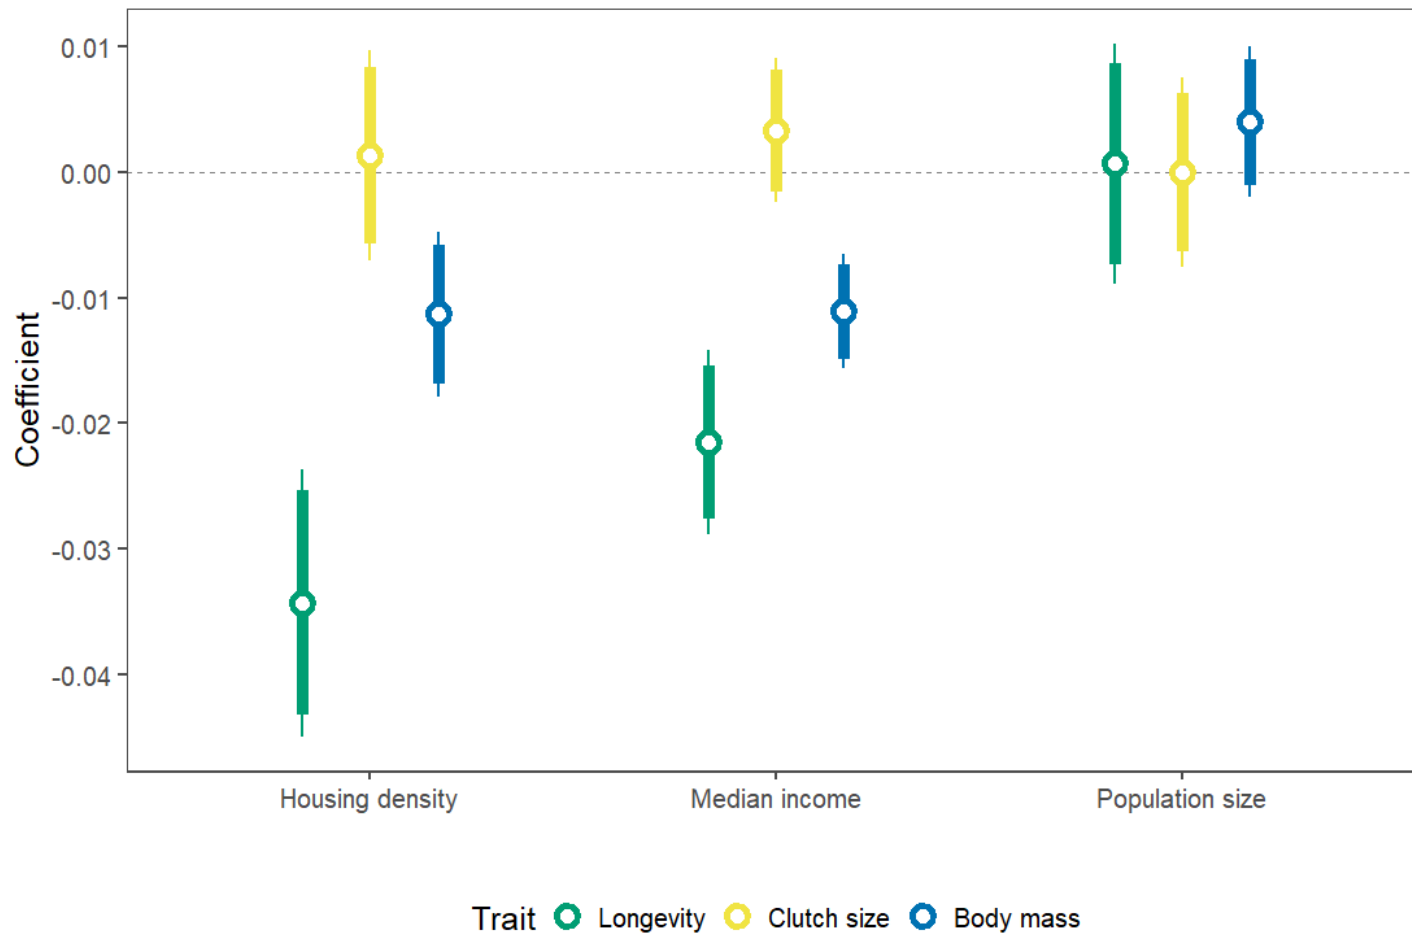

**Figure 2**

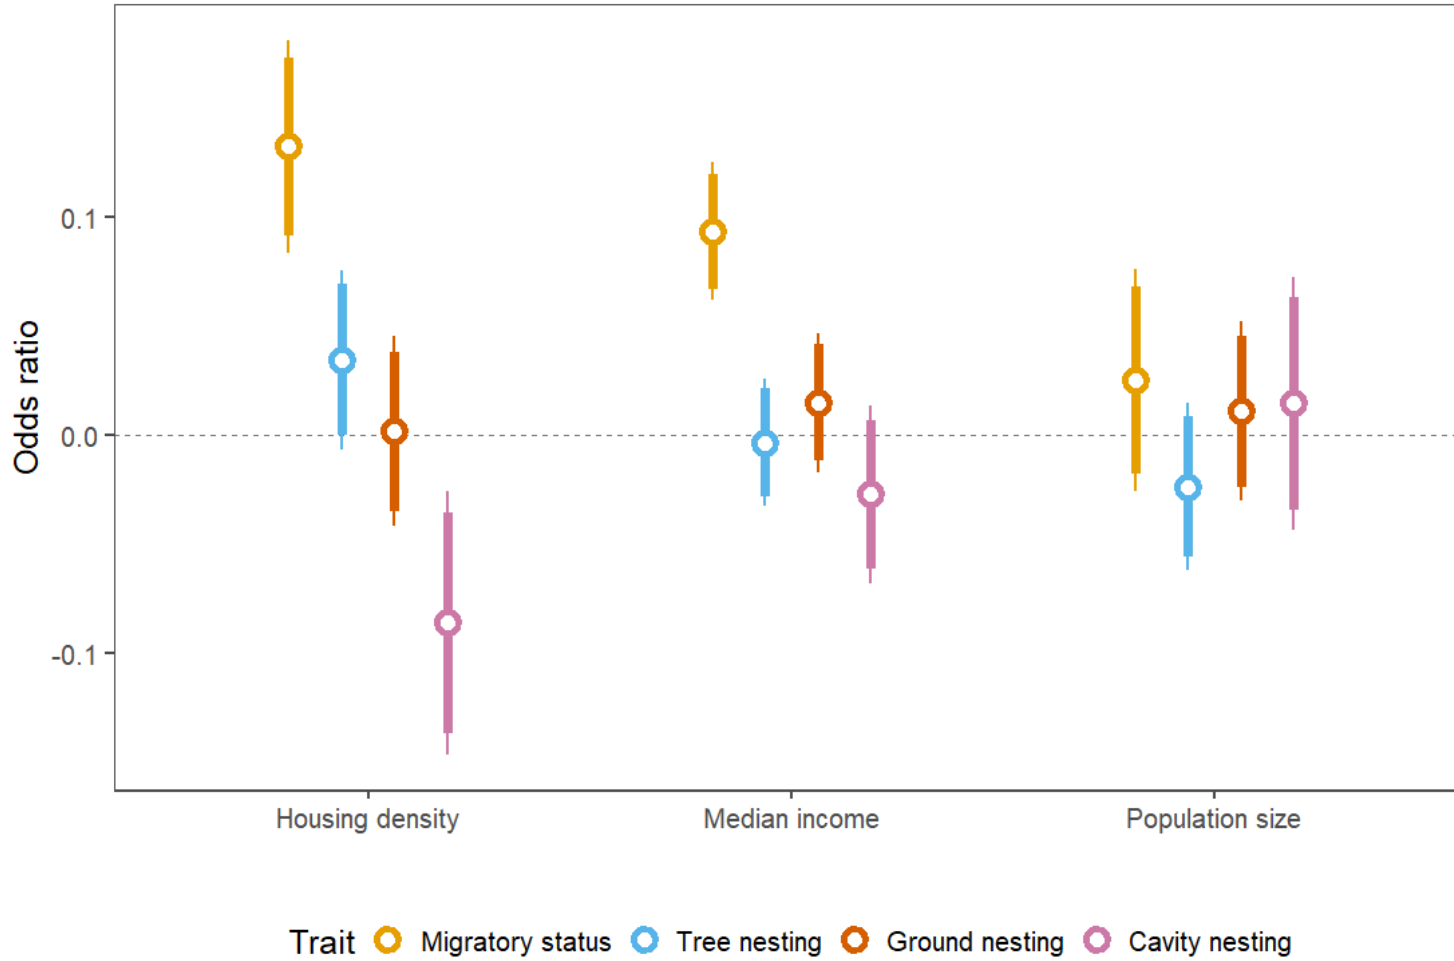

Figure 3



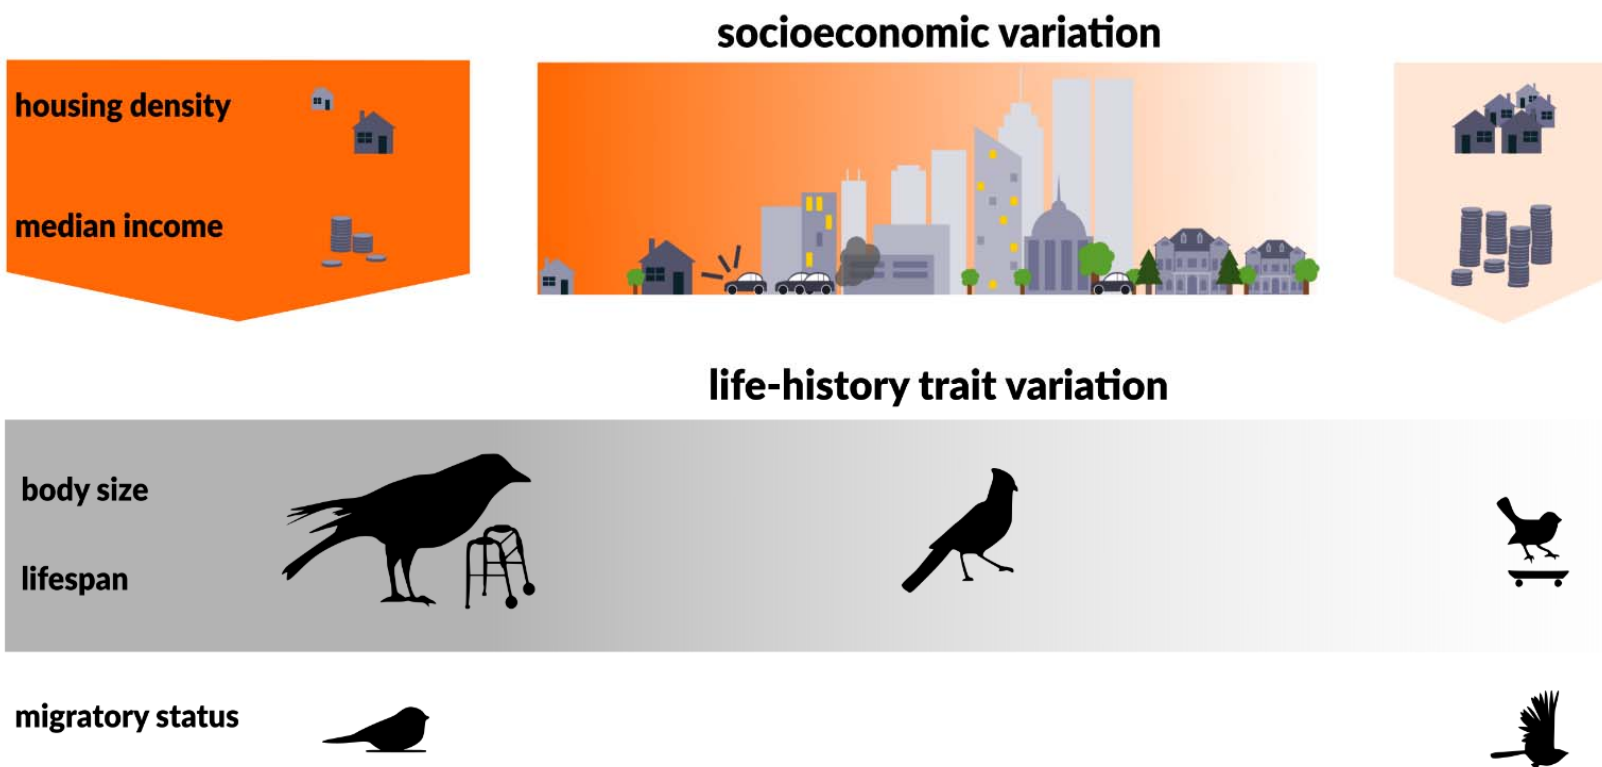

**Figure 4**

**Table 1.**

| <i>Predictors</i>     | <b>Longevity</b>       |                 | <b>Clutch size</b>     |                | <b>Body mass</b>       |                 |
|-----------------------|------------------------|-----------------|------------------------|----------------|------------------------|-----------------|
|                       | <i>Estimates</i>       | <i>95% CI</i>   | <i>Estimates</i>       | <i>95% CI</i>  | <i>Estimates</i>       | <i>95% CI</i>   |
| Intercept             | -0.334                 | -0.672 – 0.005  | 0.344                  | -0.119 – 0.807 | 3.170                  | 2.869 – 3.471   |
| Housing density       | -0.034                 | -0.045 – -0.024 | 0.001                  | -0.007 – 0.010 | -0.011                 | -0.018 – -0.005 |
| Median income         | -0.022                 | -0.029 – -0.014 | 0.003                  | -0.002 – 0.009 | -0.011                 | -0.016 – -0.007 |
| Population size       | 0.001                  | -0.009 – 0.010  | 0.000                  | -0.008 – 0.008 | 0.004                  | -0.002 – 0.010  |
| <b>Random Effects</b> |                        |                 |                        |                |                        |                 |
| $\sigma^2$            | 0.50                   |                 | 0.31                   |                | 0.20                   |                 |
| $\tau_{00}$           | 0.01 <sub>State</sub>  |                 | 0.00 <sub>State</sub>  |                | 0.00 <sub>State</sub>  |                 |
|                       | 0.75 <sub>family</sub> |                 | 1.44 <sub>family</sub> |                | 0.60 <sub>family</sub> |                 |
| N                     | 26 <sub>family</sub>   |                 | 26 <sub>family</sub>   |                | 26 <sub>family</sub>   |                 |
|                       | 49 <sub>State</sub>    |                 | 49 <sub>State</sub>    |                | 49 <sub>State</sub>    |                 |

**Table 2.**

| <i>Predictors</i>     | <b>Migratory status</b> |                | <b>Tree nesting</b> |               | <b>Ground nesting</b> |               | <b>Cavity nesting</b> |               |
|-----------------------|-------------------------|----------------|---------------------|---------------|-----------------------|---------------|-----------------------|---------------|
|                       | <i>Odds Ratios</i>      | <i>95 % CI</i> | <i>Odds Ratios</i>  | <i>95% CI</i> | <i>Odds Ratios</i>    | <i>95% CI</i> | <i>Odds Ratios</i>    | <i>95% CI</i> |
| Intercept             | 1.551                   | 0.053 – 45.176 | 0.000               | 0.000 – 0.018 | 0.046                 | 0.002 – 1.317 | 0.000                 | 0.000 – 0.000 |
| Housing density       | 1.141                   | 1.087 – 1.198  | 1.035               | 0.993 – 1.079 | 1.002                 | 0.959 – 1.046 | 0.918                 | 0.864 – 0.975 |
| Median income         | 1.098                   | 1.064 – 1.133  | 0.997               | 0.968 – 1.026 | 1.015                 | 0.983 – 1.048 | 0.973                 | 0.935 – 1.014 |
| Population size       | 1.026                   | 0.975 – 1.079  | 0.977               | 0.940 – 1.015 | 1.011                 | 0.970 – 1.054 | 1.015                 | 0.957 – 1.075 |
| <b>Random Effects</b> |                         |                |                     |               |                       |               |                       |               |
| $\sigma^2$            | 0.65                    |                | 0.68                |               | 0.57                  |               | 0.40                  |               |
| $\tau_{00}$           | 0.21 State              |                | 0.01 State          |               | 0.01 State            |               | 0.06 State            |               |
|                       | 92.60 family            |                | 161.40 family       |               | 84.77 family          |               | 508.98 family         |               |
| N                     | 26 family               |                | 26 family           |               | 26 family             |               | 26 family             |               |
|                       | 49 State                |                | 49 State            |               | 49 State              |               | 49 State              |               |

Figure 1. Map of 44,670 bird observations of 160 Passerine species in 1,908 urban areas across the United States. Circles represent the longitude and latitude coordinates of bird observations.

Figure 2. Linear mixed-effects model coefficients for urban predictors of passerine life-history traits in the United States. Open circles represent coefficient estimates, bold whiskers are 90% confidence intervals, and narrow whiskers are 95% confidence intervals. Body mass was  $\log_{10}$ -transformed. Sample size is the same for all variables ( $n = 44,670$ ).

Figure 3. Generalized linear mixed-effects model coefficients for the predictors of passerine migratory status and nesting preferences in the United States. Open circles are coefficient estimates, bold whiskers are 90% confidence intervals, and narrow whiskers are 95% confidence intervals. Species are classed as migratory = 1 or resident = 0; tree nesting, ground nesting and cavity nesting = 1 or other places = 0. An odds ratio greater than one indicates that the chance of finding a migrant bird or a species with a certain nesting preference in the area is higher than a chance of finding a resident or a bird with any other nesting preference, and vice versa. The sample size is the same for all the variables ( $n = 44,670$ ).

Figure 4. Our results suggest that from a bird's eye view cities are heterogeneous habitats supporting different life-history strategies that depend on the socioeconomic variation across cities. As a city's housing density and median income increased it supported species with smaller body sizes and shorter lifespans, and more migratory species. This suggests that differential survival and reproduction at the species-level can quickly generate geographical patterns of

species trait variation across urban environments similar to those found in natural settings without the need for evolutionary change.

Table 1. Model summaries and the number of observations for the urban predictors of passerine life-history traits and the predictors of passerine migratory status in the United States. One model was fit to data per response variable, including all the urban characteristics: housing density, median income, and human population size. Body mass was log<sub>10</sub>-transformed. The coefficient of variation is an indicator of model fit. Random effects were specified as (1 | family) and (1 | state), where each level of the grouping factors, family and state, had their own random intercept. The symbol  $\sigma^2$  is the residual variance;  $\tau_{00}$  is the variance among the random effects; and N the total number of groups. Number of observations is the same for all the variables (n = 44,670).

Table 2. Model summaries for urban predictors of passerine migratory status and nesting preferences in the United States. One model was fit to data per response variable, including all the urban characteristics. The coefficient of variation is an indicator of model fit. Species are classed as migratory = 1 or resident = 0; tree nesting, ground nesting and cavity nesting = 1 or other places = 0. An odds ratio greater than one indicates that the chance of finding a migrant or a bird with a specific nesting preference is higher than the chance of finding a resident or a species with any other nesting preference. Random effects were specified as in Table 1. The symbol  $\sigma^2$  is the residual variance;  $\tau_{00}$  is the variance among the random effects; and N the total number of groups. Number of observations is the same for all the variables (n = 44,670).
